# Supplementary material for: Electrocatalytic dinitrogen reduction reaction on silicon carbide: a density functional theory study
Source: Royal Society of Chemistry journal article supplement (doi:10.1039/d0cp03246h), 2020-01-01
Supplement: d0cp03246h1.pdf [file d0cp03246h1.pdf]

## Supporting Information for

### Electrocatalytic Dinitrogen Reduction Reaction on Silicon Carbide: a Density Functional Theory Study

Zhongyuan Guo <sup>a, b</sup>, Siyao Qiu,<sup>a,\*</sup> Huan Li,<sup>a</sup> Yongjun Xu,<sup>a</sup> Steven J. Langford,<sup>b</sup> Chenghua Sun<sup>b,\*</sup>

<sup>a</sup> Science & Technology Innovation Institute, Dongguan University of Technology, Dongguan 523808, China.

<sup>b</sup> Department of Chemistry and Biotechnology, Faculty of Science, Engineering & Technology, Swinburne University of Technology, Hawthorn, Victoria 3122, Australia

**Abstract:** Approaches that advance electrochemical nitrogen fixation under ambient conditions and powered by renewable energy are challenged by the identification of an effective electrocatalysts for nitrogen reduction. Silicon carbide is investigated computationally as a metal-free, surface-derived catalyst for the electrocatalytic nitrogen reduction reaction. As demonstrated by first-principle calculations, Si-terminated and C-terminated surfaces with the Si and C as active sites are all reactive for dinitrogen capture and activation, resembling the catalytic behaviour of popular B-based electrocatalysts, but the latter (C-terminated) offers an ultralow over-potential of 0.39 eV, being lower than most metals and alloys, while retarding hydrogen evolution. This research enriches the design of catalysts for dinitrogen fixation under ambient conditions, meanwhile indicates a new direction of Si-based materials for nitrogen reduction.

## **Table of Contents**

- 1. Partial density of states of \*NN on SiC**
- 2. Charge analyses**
- 3. N-N bond evolution**
- 4. Comparison with some recently reported results**
- 5. Free energy correction of NRR on Si-SiC**
- 6. Free energy correction of NRR on C-SiC**
- 7. References**

## 1. Partial density of states of \*NN on SiC

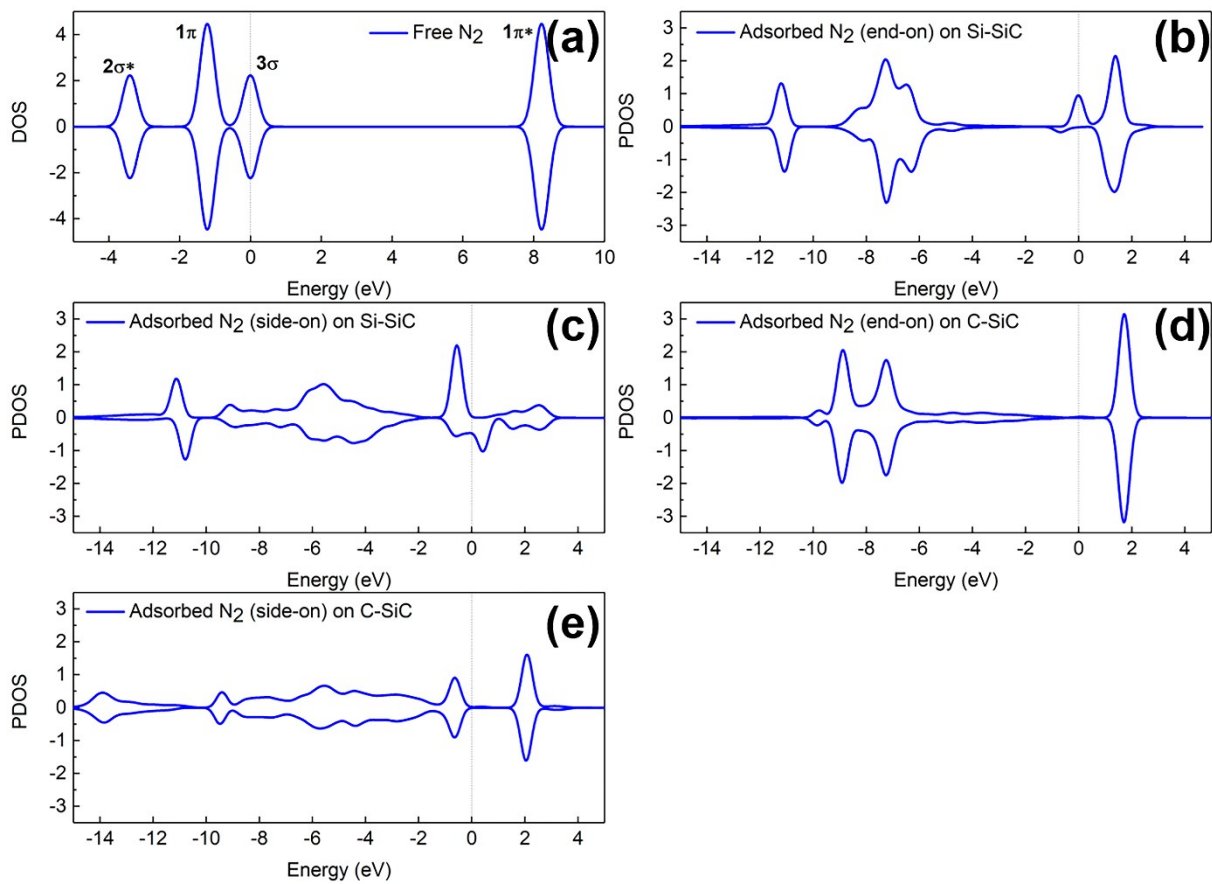

**Figure S1.** PDOS of free nitrogen molecule (a) and adsorbed dinitrogen adatoms on Si-SiC (b, c) and C-SiC (d, e).

## 2. Charge analyses

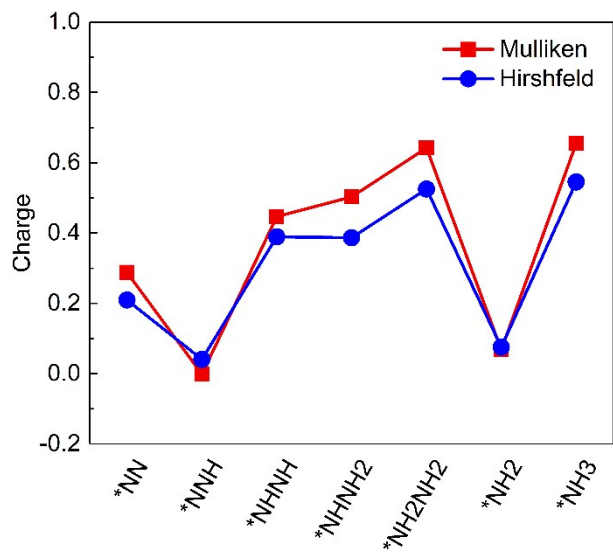

**Figure S2.** Mulliken and Hirshfeld charge analyses for reaction intermediates on C-SiC along the alternating reaction pathway.

### 3. N-N bond evolution

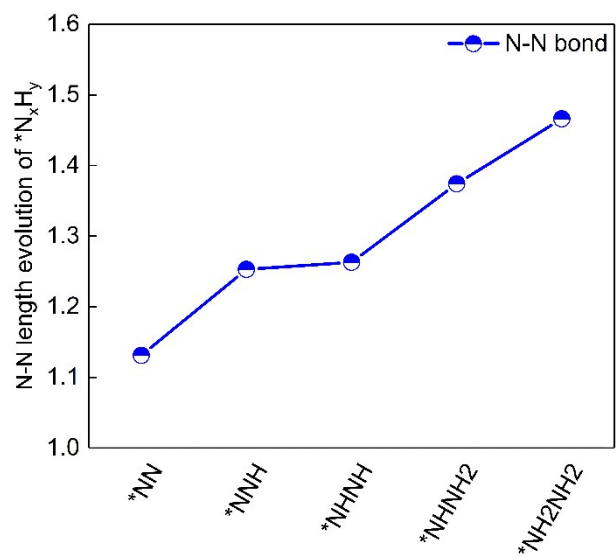

**Figure S3.** The length changes of N-N bond along the alternating reaction pathway on C-SiC.

#### 4. Comparison with some recently reported results

**Table S1.** Recent reports for ENRR in comparison with our calculations on SiC

| Catalyst materials                                                           | Results                                                                                    |                                                                                 | References |
|------------------------------------------------------------------------------|--------------------------------------------------------------------------------------------|---------------------------------------------------------------------------------|------------|
|                                                                              | Experiments                                                                                | Theoretical calculations                                                        |            |
| Boron-doped InSe monolayer                                                   | —                                                                                          | $\eta = 0.50 \text{ V}$ ( $U_L = -0.66 \text{ V}$ , distal pathway)             | <b>1</b>   |
| Mo-Phthalocyanine monolayer                                                  | —                                                                                          | $\eta = 0.54 \text{ V}$ ( $U_L = -0.70 \text{ V}$ , distal/alternating pathway) | <b>2</b>   |
| Ni-WS <sub>2</sub><br>(single Ni1 atom supported on defective WS2 monolayer) | —                                                                                          | $\eta = 0.70 \text{ V}$ ( $U_L = -0.86 \text{ V}$ , distal/alternating pathway) | <b>3</b>   |
| Bioinspired Fe <sub>3</sub> C@C composite                                    | $r(\text{NH}_3) = 8.53 \mu\text{g h}^{-1} \text{mg}^{-1}$<br>at -0.2 V vs. RHE, FE = 9.15% | $\eta = 0.667 \text{ V}$ ( $U_L = -0.827 \text{ V}$ , alternating pathway)      | <b>4</b>   |
| Ru single-atom on PtS <sub>2</sub>                                           | —                                                                                          | $\eta = 0.93 \text{ V}$ ( $U_L = -1.09 \text{ V}$ , distal pathway)             | <b>5</b>   |
| Ru doped Mo <sub>2</sub> CT <sub>x</sub> MXene                               | $r(\text{NH}_3) = 40.57 \mu\text{g h}^{-1} \text{mg}^{-1}$<br>at -0.3 V vs. RHE, FE =      | $\eta = 0.80 \text{ V}$ ( $U_L = -0.96 \text{ V}$ , distal pathway)             | <b>6</b>   |

|                                                              |                                                                                                                              |                                                                                                     |                  |
|--------------------------------------------------------------|------------------------------------------------------------------------------------------------------------------------------|-----------------------------------------------------------------------------------------------------|------------------|
|                                                              | 25.77%                                                                                                                       |                                                                                                     |                  |
| Ti@VB <sub>2</sub> (single-atom doped on 2D metal diborides) | —                                                                                                                            | $\eta = 0.45 \text{ V}$ ( $U_L = -0.61 \text{ V}$ , distal/alternating pathway)                     | 7                |
| Mo-doping in MnO <sub>2</sub> nanoflowers                    | $r(\text{NH}_3) = 36.6 \mu\text{g h}^{-1} \text{ mg}^{-1}$<br>at $-0.5 \text{ V}$ vs. RHE, FE =<br>12.1% at $-0.4 \text{ V}$ | $\eta = 0.79 \text{ V}$ ( $U_L = -0.95 \text{ V}$ , distal pathway)                                 | 8                |
| <b>SiC</b>                                                   | —                                                                                                                            | <b><math>\eta = 0.39 \text{ V}</math> (<math>U_L = -0.55 \text{ V}</math>, alternating pathway)</b> | <b>This work</b> |

## 5. Free energy correction of NRR on Si-SiC

**Table S2.** Gibbs free energy of reaction intermediates on Si-SiC.

| <b>Intermediates</b>             | <b>DFT energy/<math>E_{\text{DFT}}</math></b> | <b>Gibbs free energy/G</b> |
|----------------------------------|-----------------------------------------------|----------------------------|
| *(Si-SiC)                        | -401207.71                                    | -401207.71                 |
| *NN (end-on)                     | -404189.53                                    | -404189.37                 |
| *NN (side-on)                    | -404190.02                                    | -404189.86                 |
| *NNH                             | -404207.18                                    | -404206.72                 |
| *NNH <sub>2</sub>                | -404222.31                                    | -404221.55                 |
| *N                               | -402699.79                                    | -402699.71                 |
| *NH                              | -402716.30                                    | -402715.92                 |
| *NH <sub>2</sub>                 | -402733.44                                    | -402732.76                 |
| *NH <sub>3</sub>                 | -402749.22                                    | -402748.24                 |
| *NHNH                            | -404223.97                                    | -404223.21                 |
| *NHNH <sub>2</sub>               | -404238.69                                    | -404237.63                 |
| *NH <sub>2</sub> NH <sub>2</sub> | -404255.27                                    | -404253.91                 |



## 6. Free energy correction of NRR on C-SiC

**Table S3.** Gibbs free energy of reaction intermediates on C-SiC.

| <b>Intermediates</b>             | <b>DFT energy/<math>E_{\text{DFT}}</math></b> | <b>Gibbs free energy/G</b> |
|----------------------------------|-----------------------------------------------|----------------------------|
| *(C-SiC)                         | -401206.84                                    | -401206.84                 |
| *NN (end-on)                     | -404188.96                                    | -404188.80                 |
| *NN (side-on)                    | -404188.66                                    | -404188.50                 |
| *NNH                             | -404204.76                                    | -404204.30                 |
| *NNH <sub>2</sub>                | -404221.43                                    | -404220.67                 |
| *N                               | -402696.38                                    | -402696.30                 |
| *NH                              | -402713.77                                    | -402713.39                 |
| *NH <sub>2</sub>                 | -402731.58                                    | -402730.90                 |
| *NH <sub>3</sub>                 | -402748.76                                    | -402747.78                 |
| *NHNH                            | -404221.55                                    | -404220.79                 |
| *NHNH <sub>2</sub>               | -404238.10                                    | -404237.04                 |
| *NH <sub>2</sub> NH <sub>2</sub> | -404254.94                                    | -404253.58                 |

## 7. References

1. B. Ma, Y. Peng, D. Ma, Z. Deng and Z. Lu, *Appl. Surf. Sci.*, 2019, **495**, 143463.
2. S. Liu, Y. Liu, X. Gao, Y. Tan, Z. Shen and M. Fan, *Appl. Surf. Sci.*, 2020, **500**, 144032.
3. X. Ma, J. Hu, M. Zheng, D. Li, H. Lv, H. He and C. Huang, *Appl. Surf. Sci.*, 2019, **489**, 684-692.
4. M. Peng, Y. Qiao, M. Luo, M. Wang, S. Chu, Y. Zhao, P. Liu, J. Liu and Y. Tan, *ACS Appl. Mater. Interfaces*, 2019, **11**, 40062-40068.
5. L. Cai, N. Zhang, B. Qiu and Y. Chai, *ACS Appl. Mater. Interfaces*, 2020, **12**, 20448-20455.
6. W. Peng, M. Luo, X. Xu, K. Jiang, M. Peng, D. Chen, T. S. Chan and Y. Tan, *Adv. Energy Mater.*, 2020, **10**, 2001364.
7. L. Ge, W. Xu, C. Chen, C. Tang, L. Xu and Z. Chen, *J. Phys. Chem. Lett.*, 2020, **11**, 5241-5247.
8. K. Chu, Y.-p. Liu, Y.-b. Li, Y.-l. Guo, Y. Tian and H. Zhang, *Appl. Catal., B*, 2020, **264**, 118525.
